# Supplementary figures and images for: The Effect of Etanercept in Nonradiographic Axial Spondyloarthritis by Stratified C‐Reactive Protein Levels
Source: PubMed Central journal article supplement — ACR Open Rheumatol. 2021 Aug 18;3(10):699–706. doi: 10.1002/acr2.11312 (PMC8516106; doi:10.1002/acr2.11312), 2021-08-18

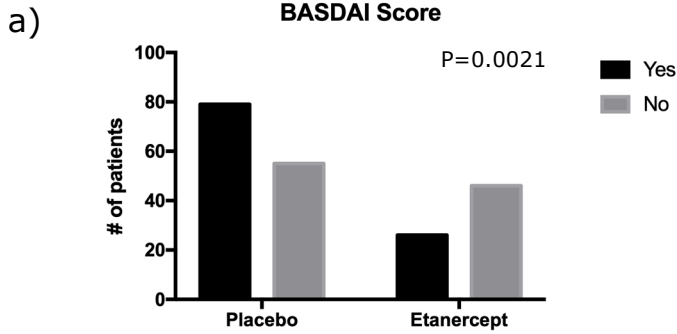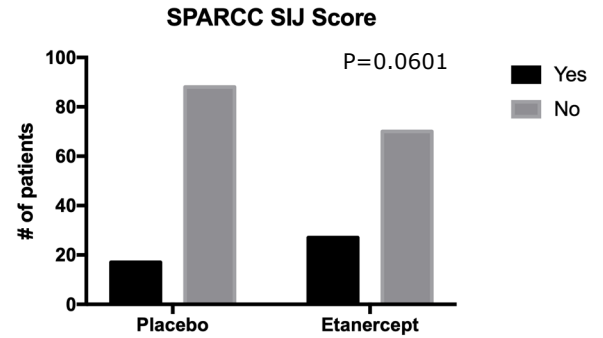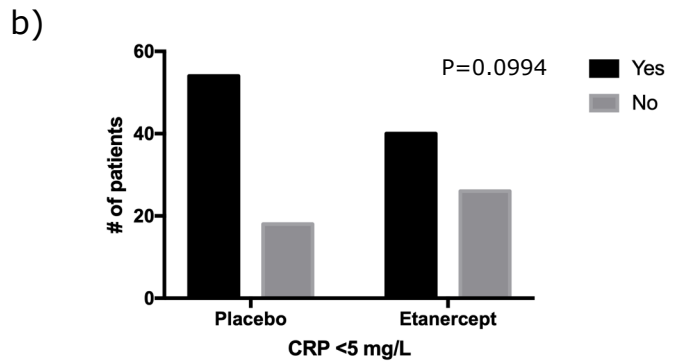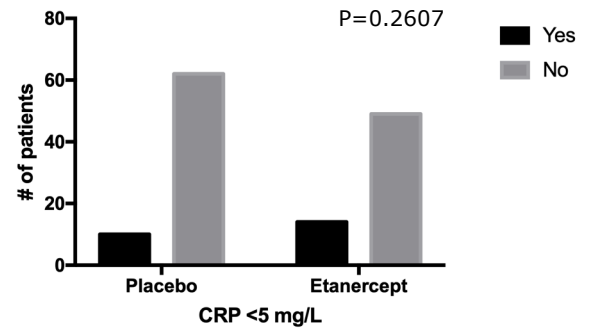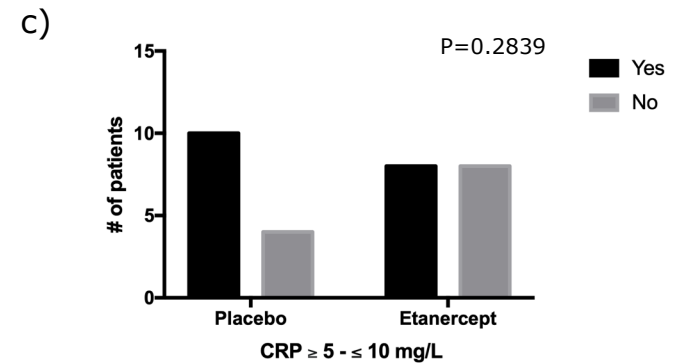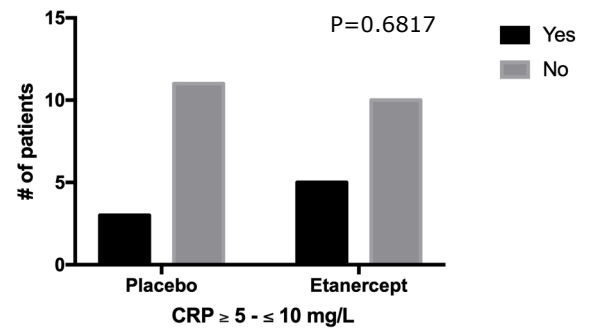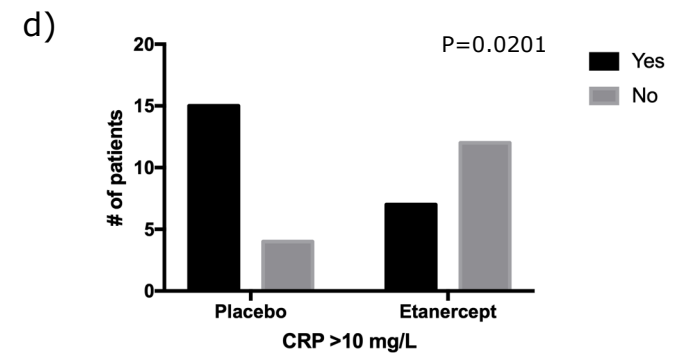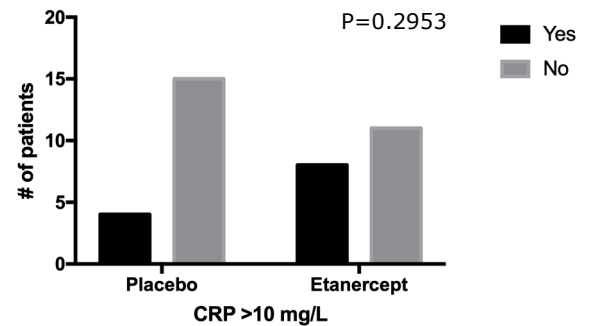

Supplement: ACR2-3-699-s002.pdf [file ACR2-3-699-s002.pdf]

a)

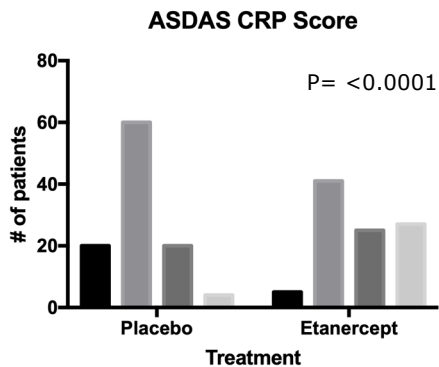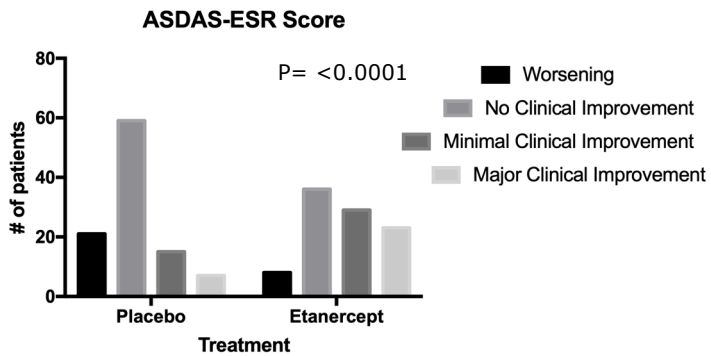

b)

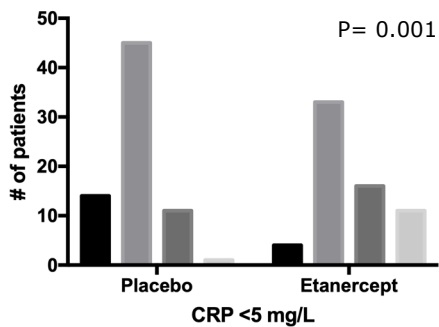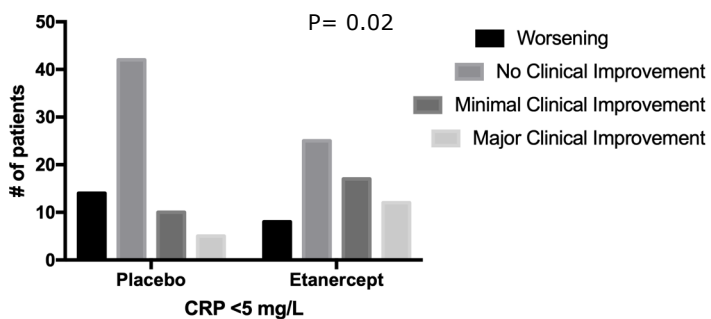

c)

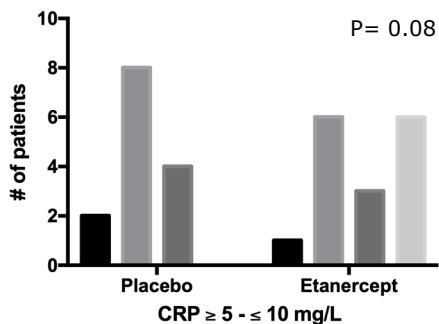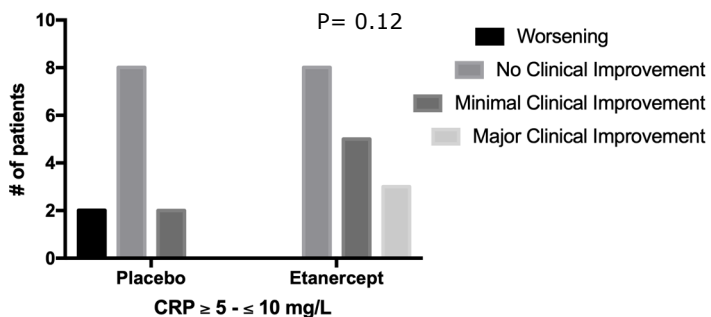

d)

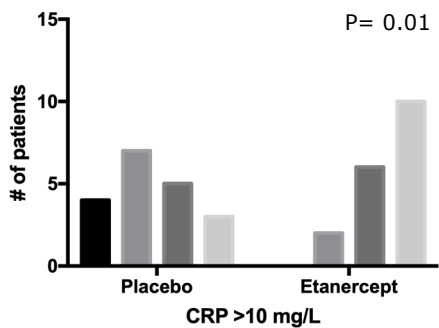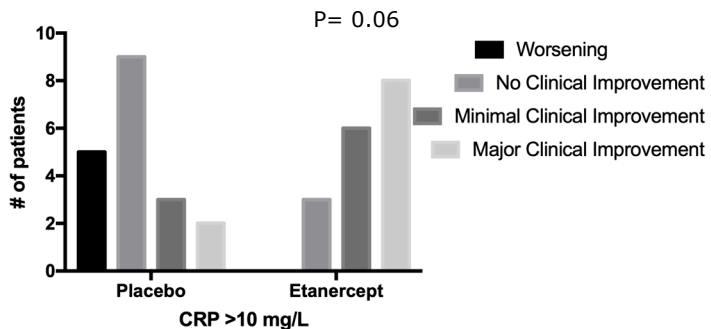

Supplement: ACR2-3-699-s003.pdf [file ACR2-3-699-s003.pdf]
